# Supplementary material for: Identification of Crowding Stress Tolerance Co-Expression Networks Involved in Sweet Corn Yield
Source: PLOS journal article supplement (doi:10.1371/journal.pone.0147418), 2016-01-21

S1 Fig. Heatmap of 7,670 genes that had a one-way ANOVA FDR p-value<0.05 and at least 1.5 FC between any two hybrid comparisons

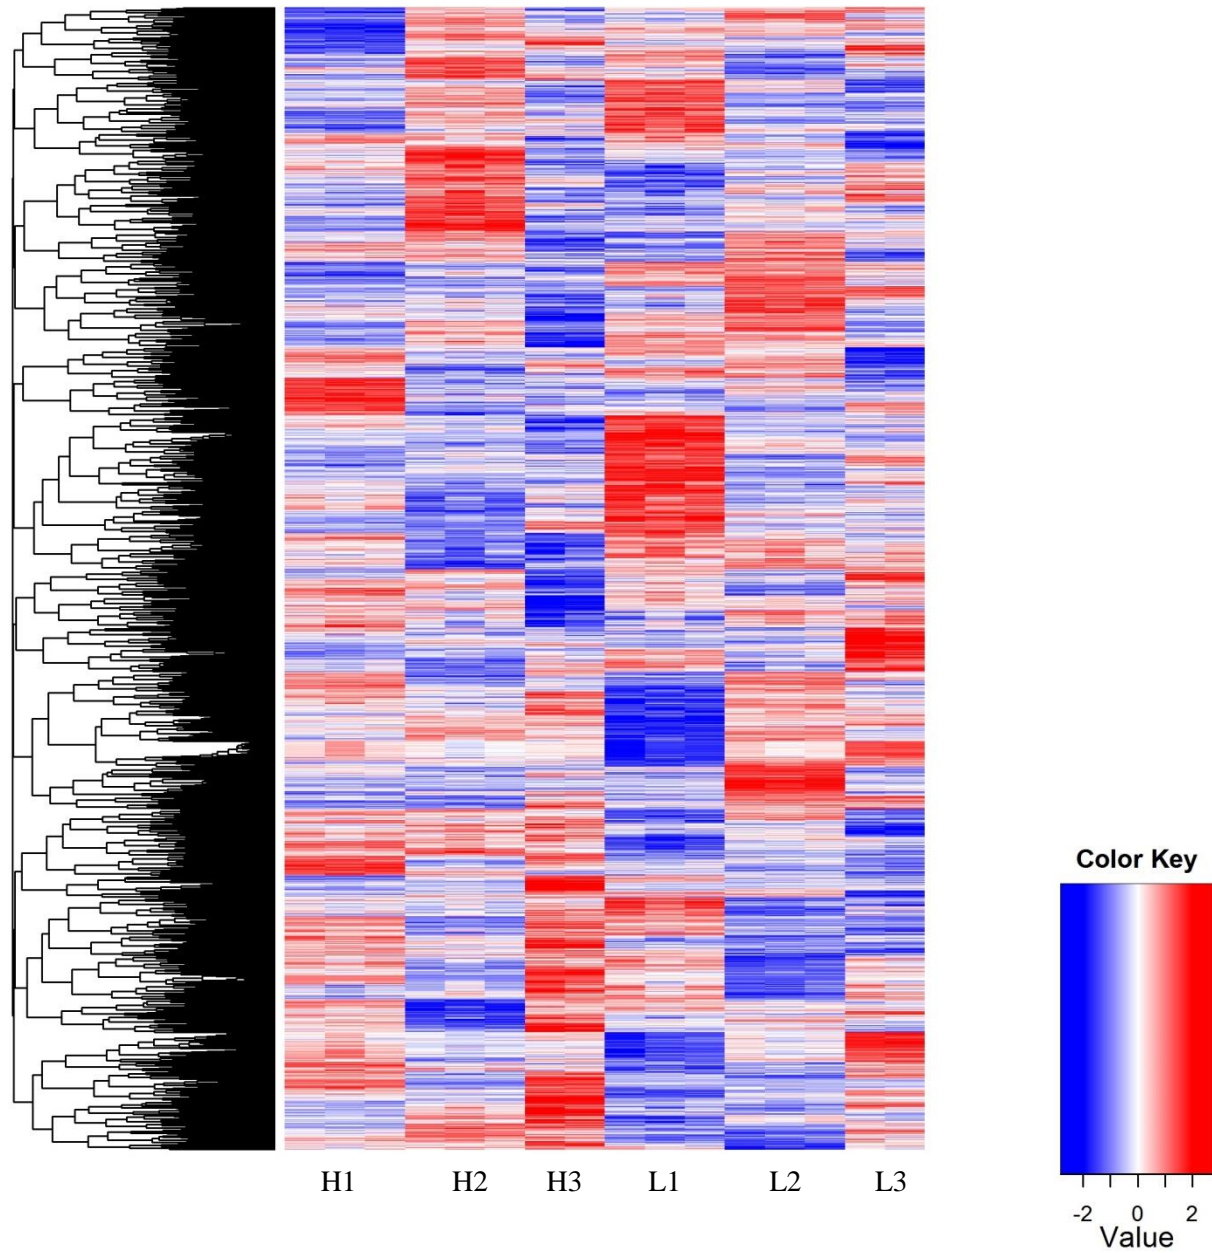

Supplement: S1 (10.1371/journal.pone.0147418.s001) [file journal.pone.0147418.s001]
